# Supplementary material for: Shapley values reveal the drivers of soil organic carbon stock prediction
Source: Copernicus journal article supplement (doi:10.5194/soil-9-21-2023), 2023-01-11
Supplement: Supplementary file 1 [file soil-9-21-2023-supplement.pdf]

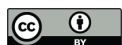

## *Supplement of*

# **Shapley values reveal the drivers of soil organic carbon stock prediction**

**Alexandre M. J.-C. Wadoux et al.**

*Correspondence to:* Alexandre M. J.-C. Wadoux ([alexandre.wadoux@sydney.edu.au](mailto:alexandre.wadoux@sydney.edu.au))

The copyright of individual parts of the supplement might differ from the article licence.

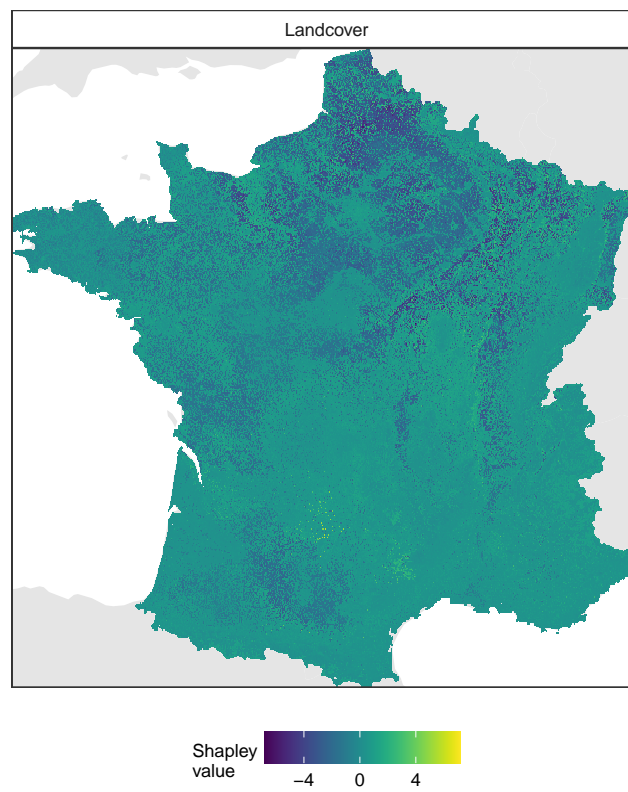

Figure S1: Spatial pattern of the Shapley values over mainland France for landcover. Dark colour indicate a negative contribution of the covariate to the SOC stocks prediction whereas a bright colour indicate a positive contribution.

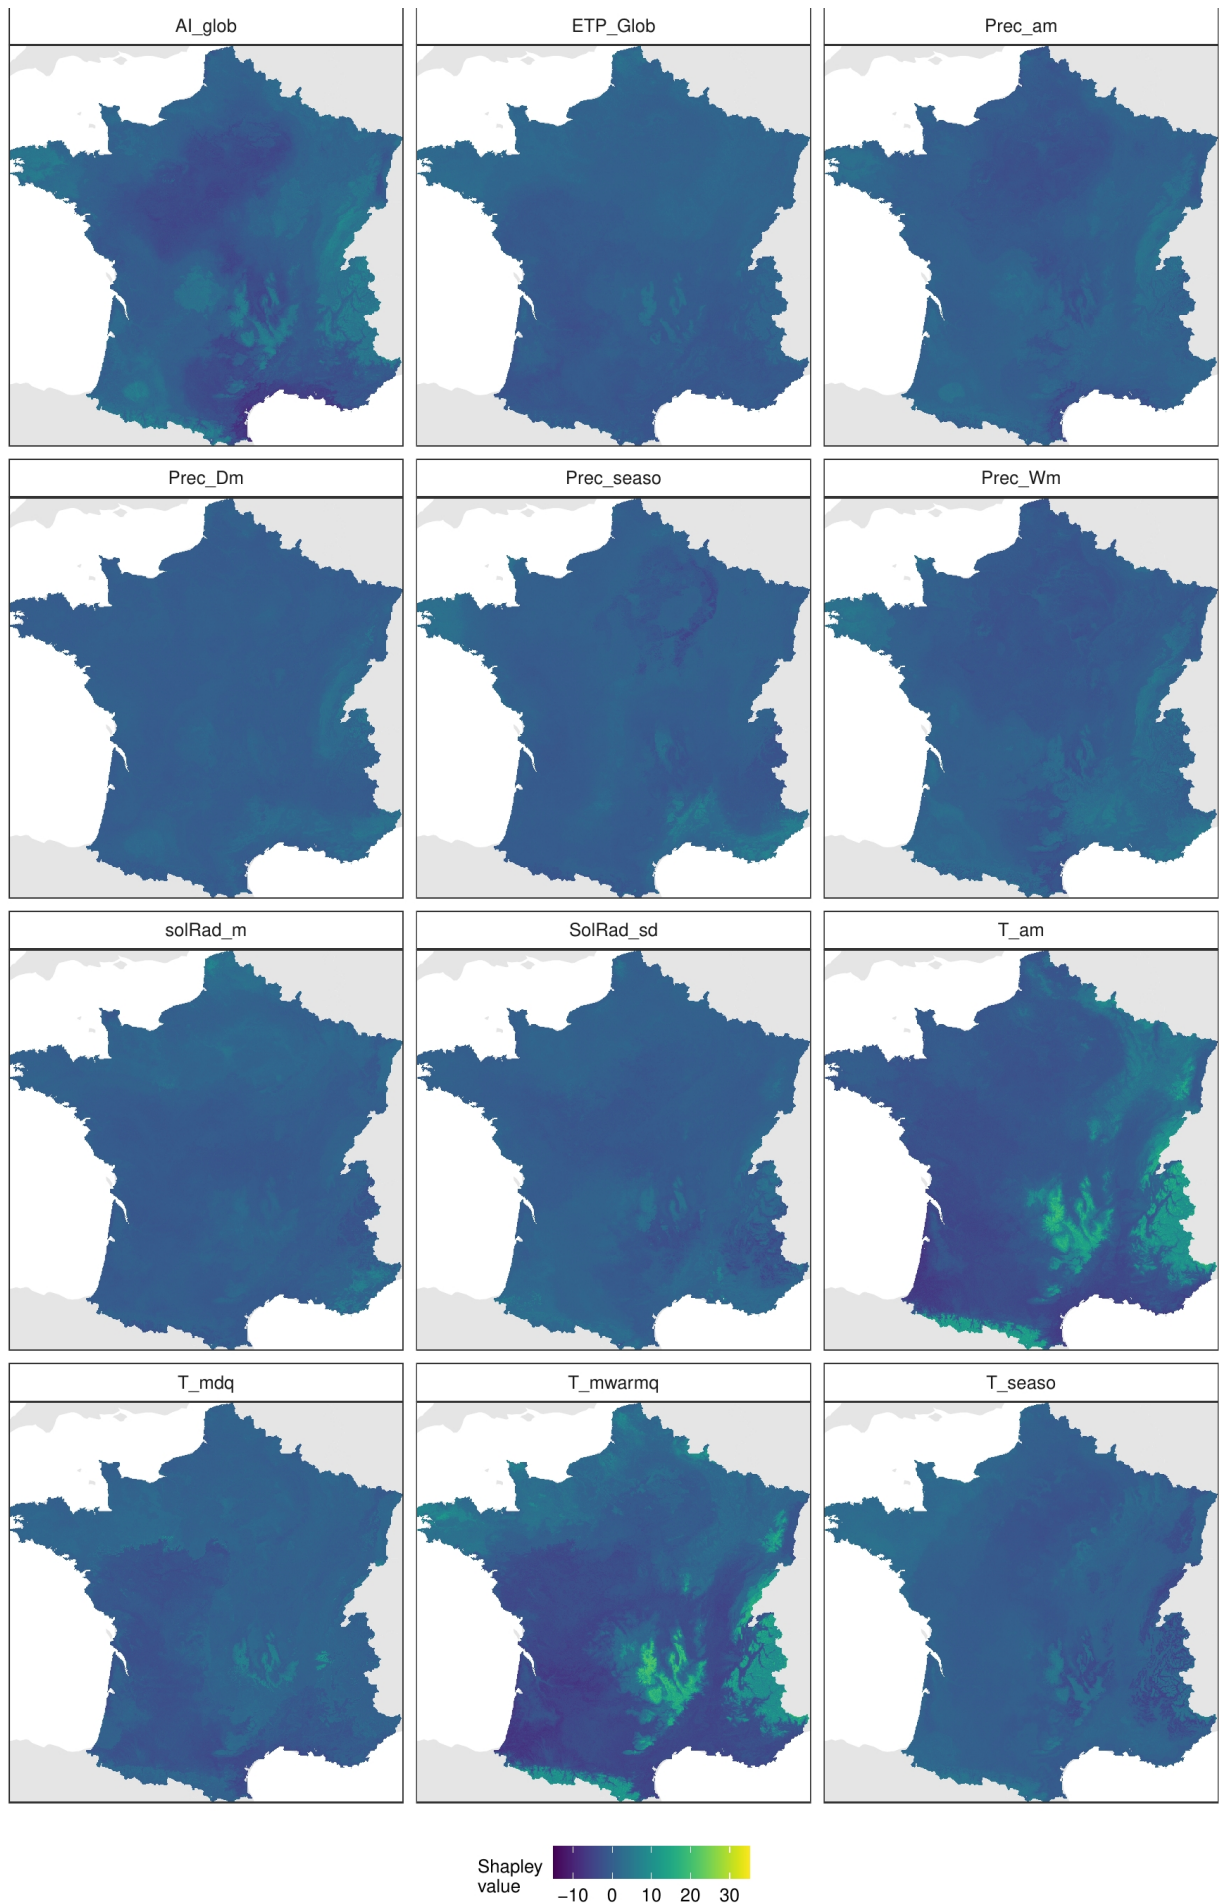

Figure S2: Spatial pattern of the Shapley values over mainland France for 12 covariates. Dark colour indicate a negative contribution of the covariate to the SOC stocks prediction whereas a bright colour indicate a positive contribution.

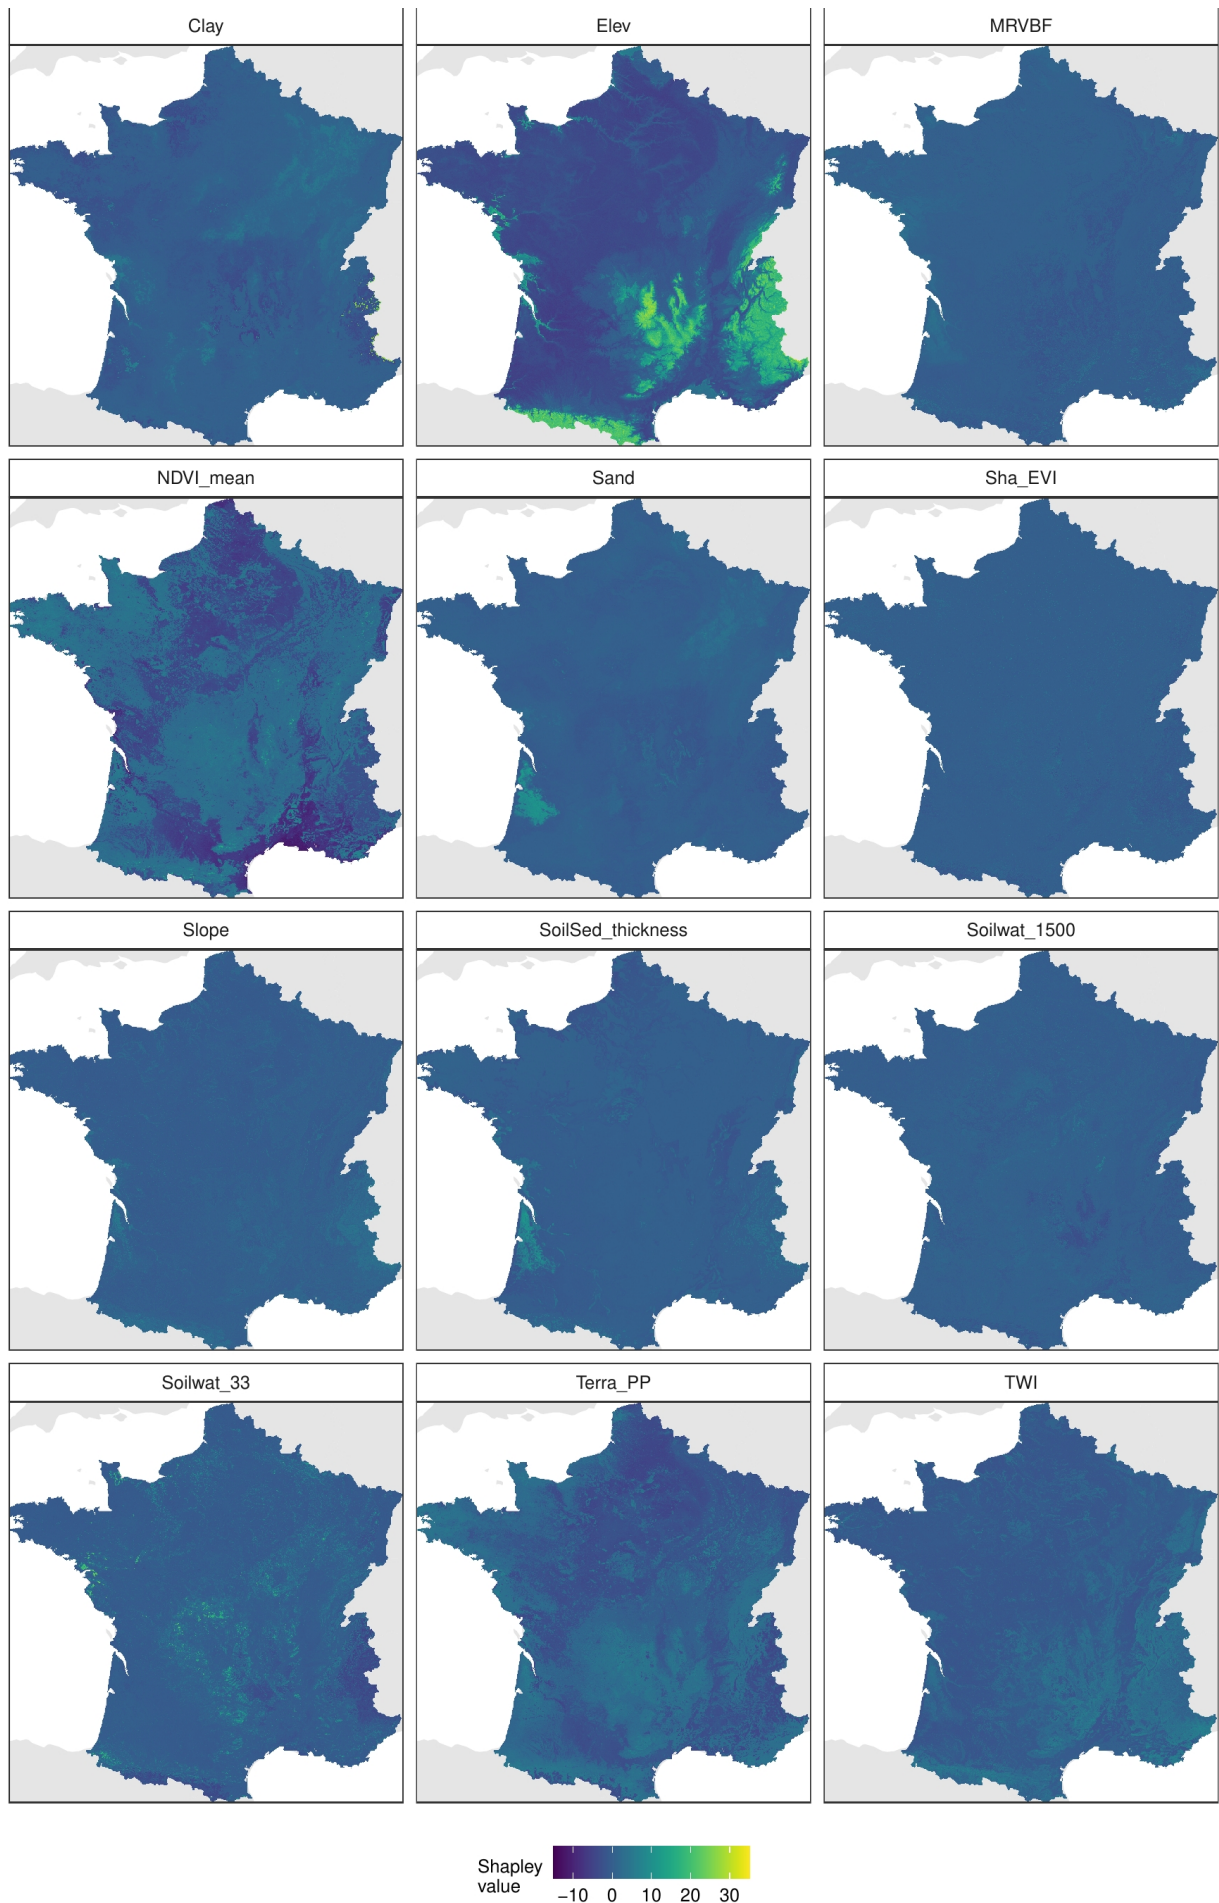

Figure S3: Spatial pattern of the Shapley values over mainland France for 12 covariates. Dark colour indicate a negative contribution of the covariate to the SOC stocks prediction whereas a bright colour indicate a positive contribution.
